# Supplementary material for: Stabilization of eukaryotic ribosomal termination complexes by deacylated tRNA
Source: PubMed Central journal article supplement — Nucleic Acids Res. 2015 Mar 9;43(6):3332–43. doi: 10.1093/nar/gkv171 (PMC4381076; doi:10.1093/nar/gkv171), 2015-03-09
Supplement: supp_gkv171_nar-03506-v-2014-File007.pdf [file supp_gkv171_nar-03506-v-2014-File007.pdf]

## SUPPLEMENTARY DATA

Table S1. Sequences of primers used in tRNA<sup>Val2</sup> mutagenesis and obtaining of mini-helix structures.

| primer          | 5'-3' sequence                                                 |
|-----------------|----------------------------------------------------------------|
| V3_for          | AAA AAA AAG CTT CTC CAC ACA TTA CAC CAC CAC CAT                |
| DV9994_for      | AAG CTT TAA TAC GAC TCA CTA TAG CTT CTG TAG                    |
| DV9994_rev      | TCT AGA CCT GGT GCT TCT GCC C                                  |
| DV9994(GC)_for  | AAG CTT TAA TAC GAC TCA CTA TAG GTT CTG TAG                    |
| DV9994(GC)_rev  | TCT AGA CCT GGT GGT TCT GCC C                                  |
| DV9994_5'(mini) | AAA AAG CTT TAA TAC GAC TCA CTA TAG CTT CTG CCC GGT TCG AGA CC |
| DV9994_3'(mini) | AAA TCT AGA CCT GGT GCT TCT GCC CGG TCT CGA ACC GGG CAG AAG C  |

Figure S1. Additional results, obtained by testing of TC in the presence of tRNA<sup>His</sup> (**A**) RelE analysis of termination complex stabilized by tRNA<sup>His</sup>. (**B**) Toe-prints with the C domain of eRF1 at UAA stop codon. cDNAs corresponding to preTC and TC have the 127 and 125 nt length, respectively. RFU, relative fluorescence unit. (**C**) The efficiency of hydrolysis of the peptidyl-tRNA in the presence of eRF1, eRF3, GTP and tRNA<sup>His</sup>. All the experiments have been replicated at least three times.

Figure S2. Functional characteristics of tRNA mutants. Toe-prints of preTC obtained during elongation of translation with tRNA<sup>Val2</sup>, tRNA<sup>Val(CG)</sup>, tRNA<sup>Val(GC)</sup>. cDNAs corresponding to preTC, TC and RelE-print have the 127, 125 and 184 nt length, respectively. RFU, relative fluorescence unit.

Figure S3. Structure of H68 and H69 helixes from the yeast 25S rRNA. Grey selections show nucleotides participating in interaction of the ribosome with acceptor stem of E site tRNA and N domain of eRF1.

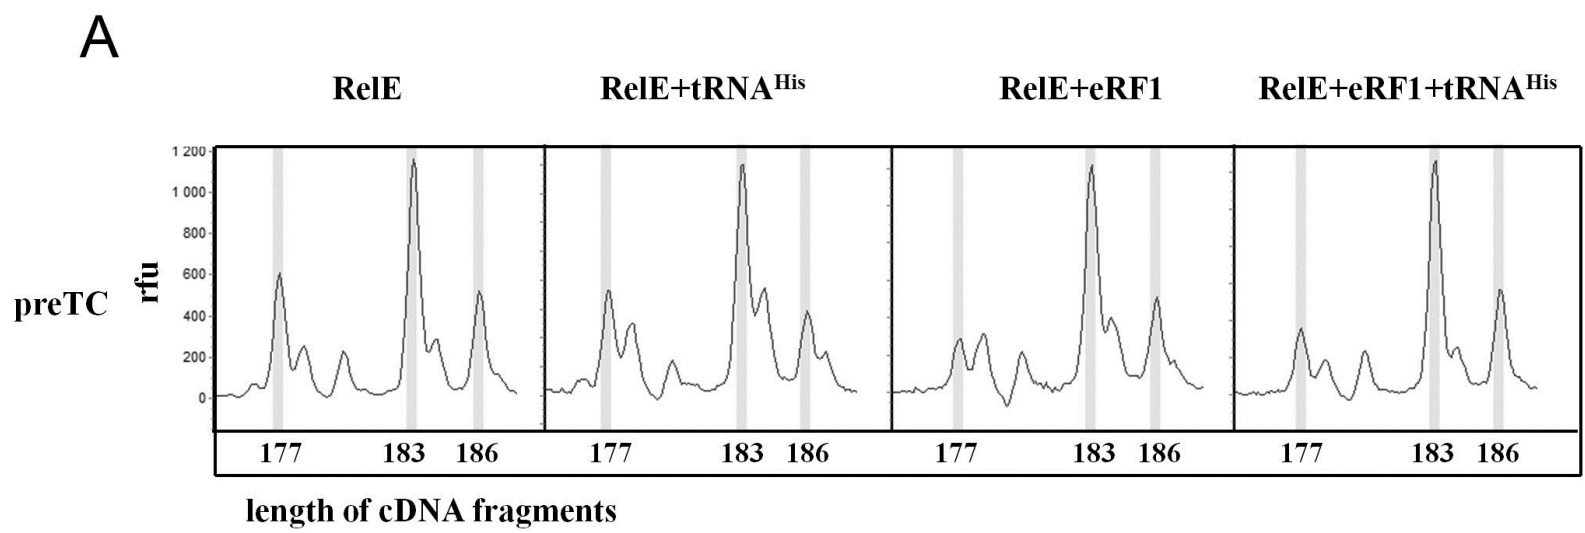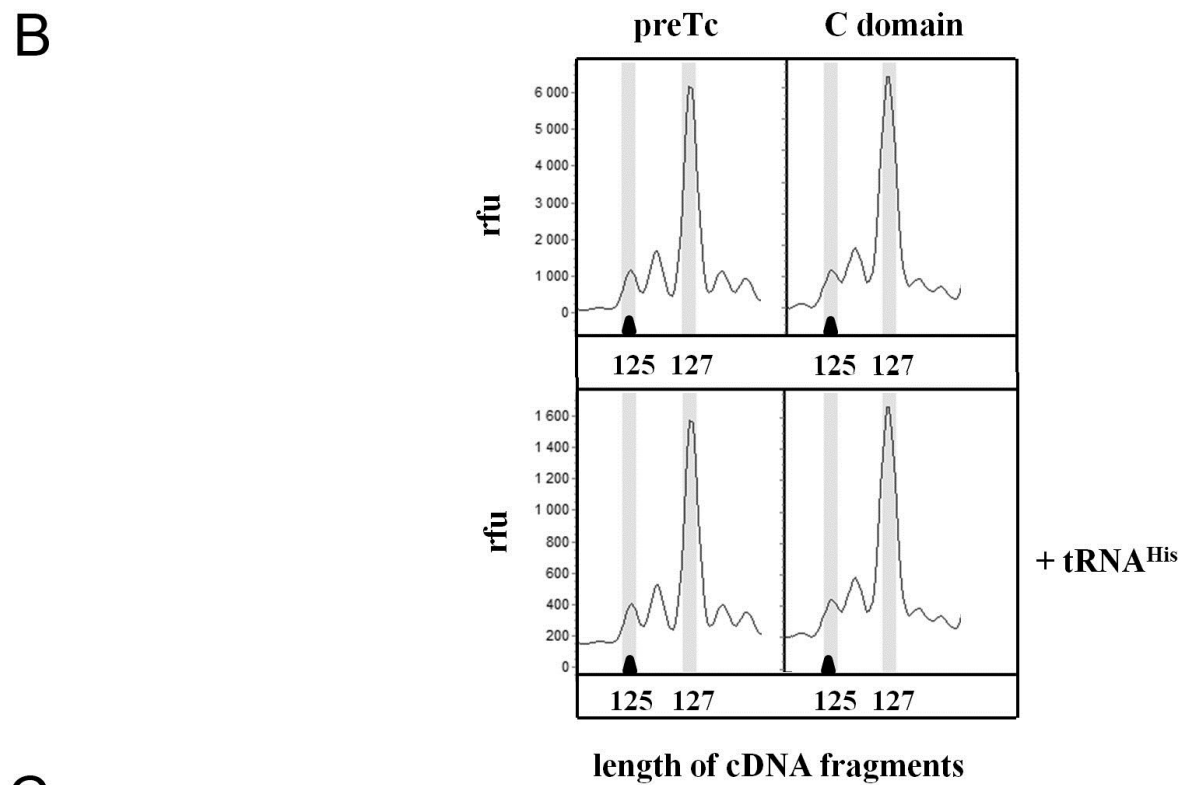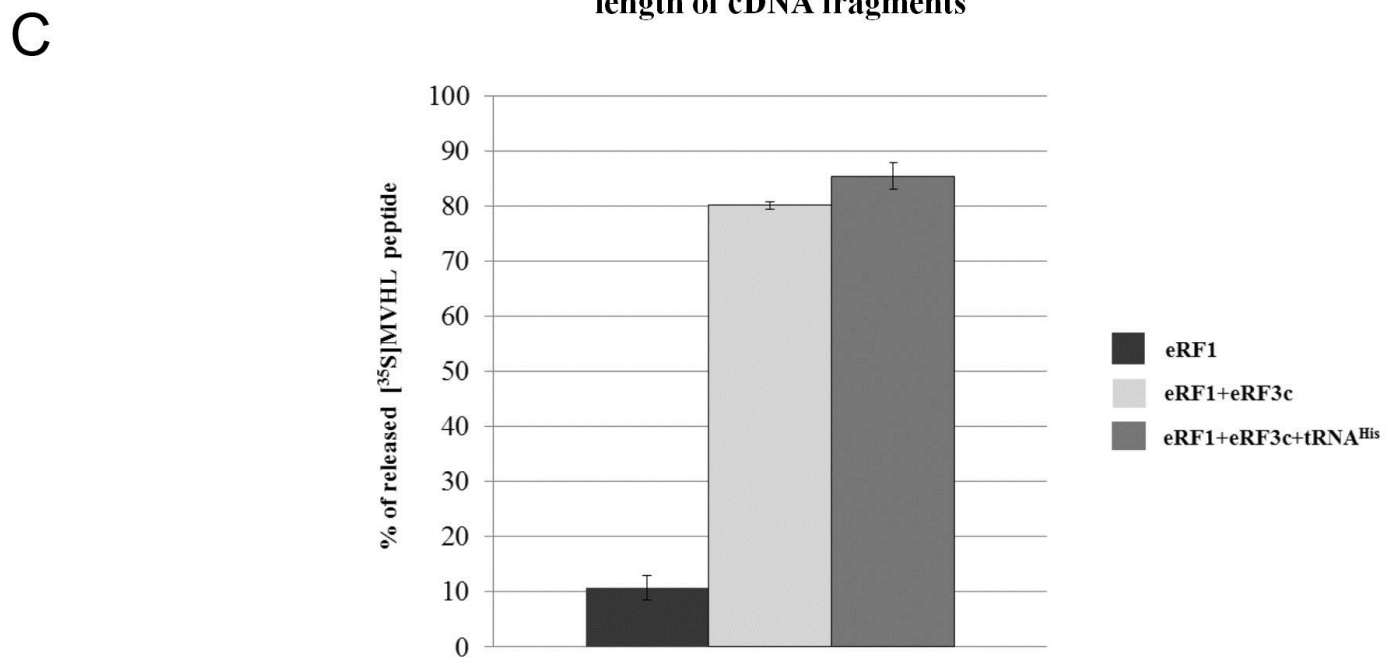

**Figure S1.**

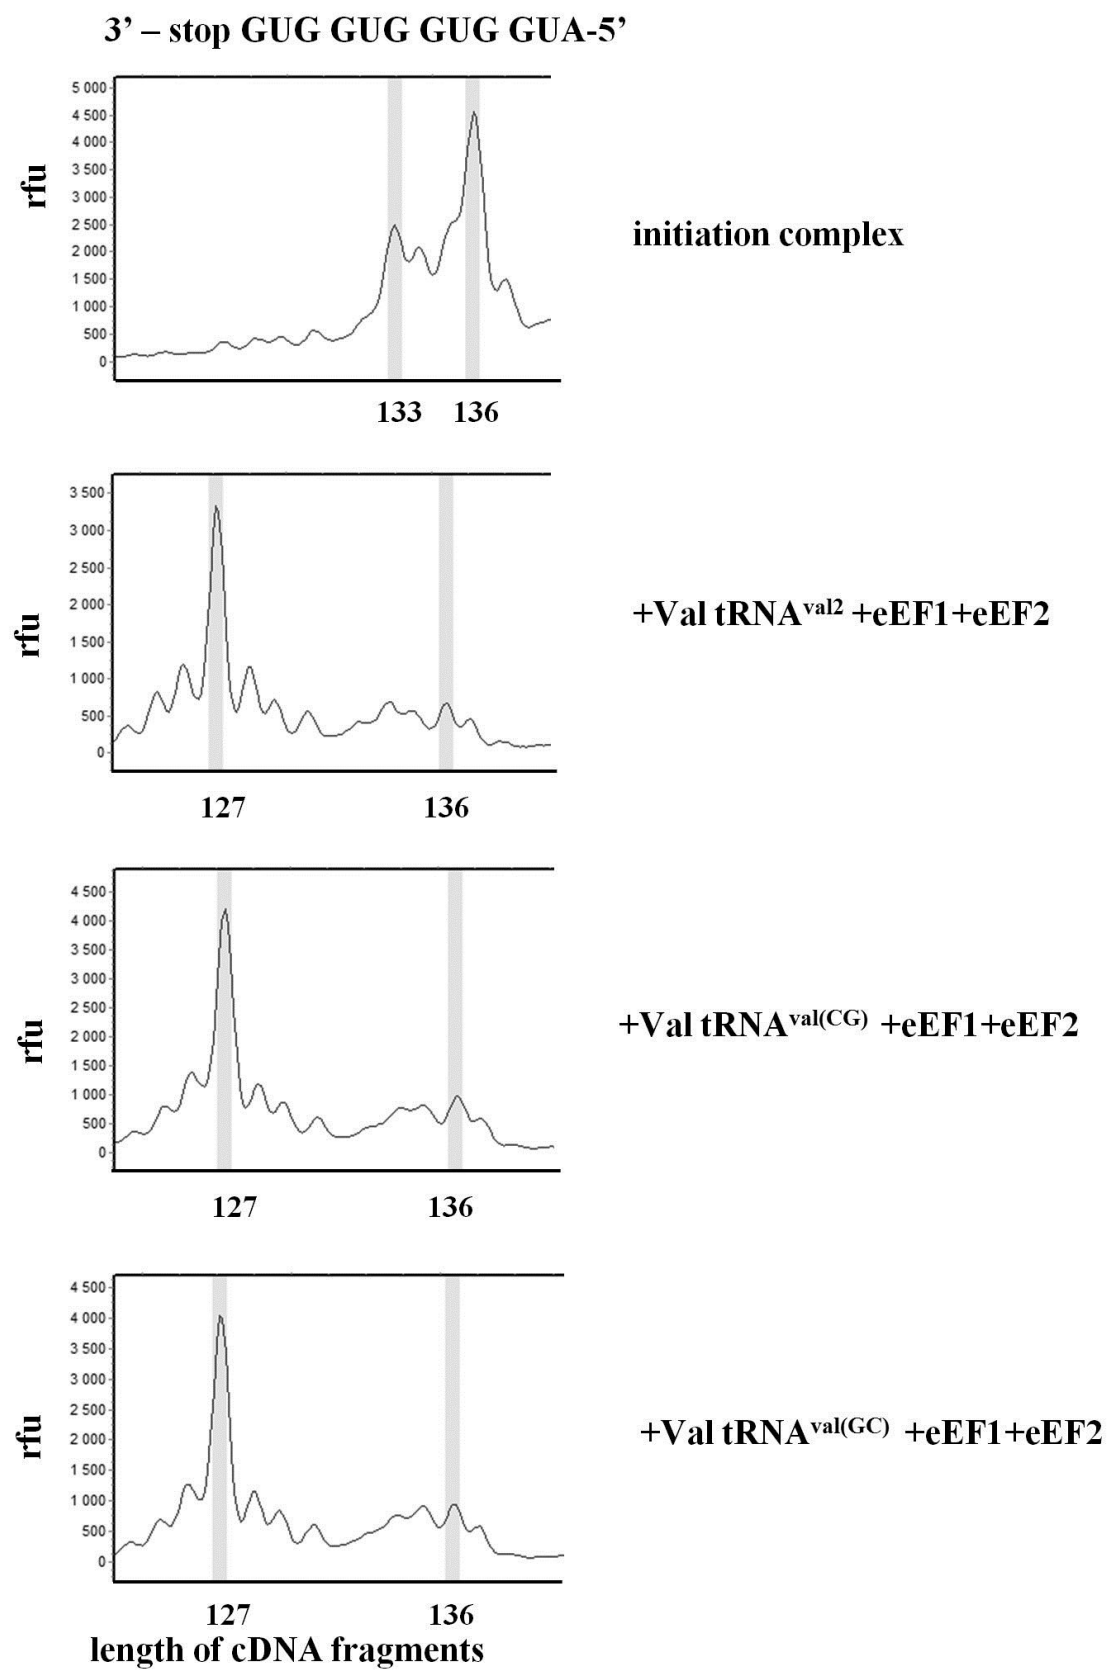

**Figure S2.**

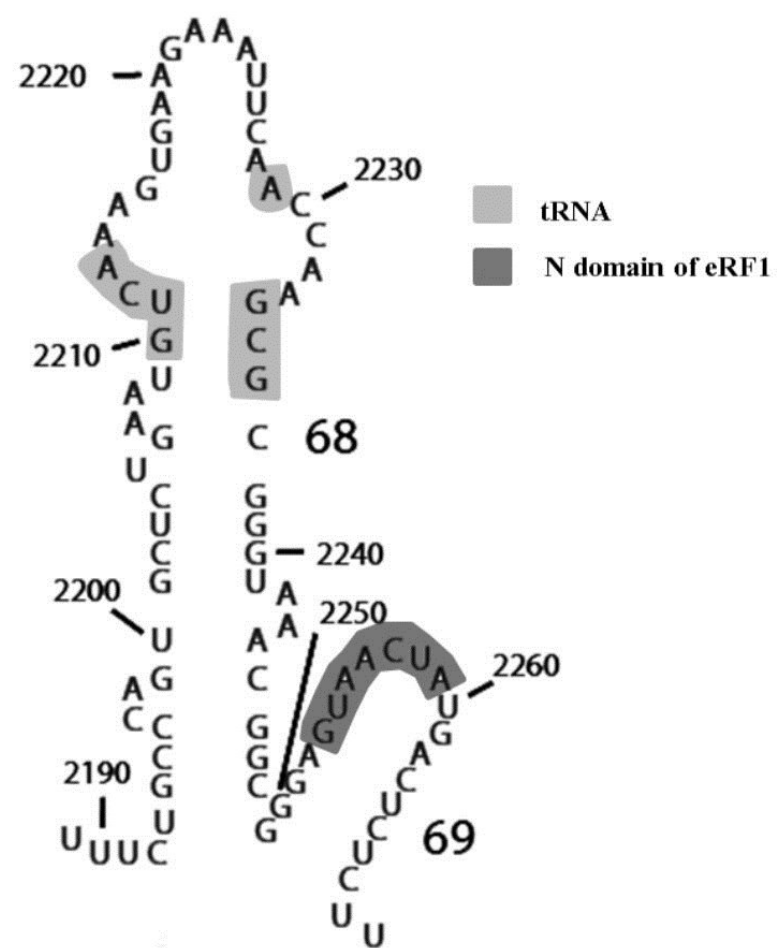

**Figure S3.**
